1 **SPECIES-SPECIFIC ROOT MICROBIOTA DYNAMICS IN**  
2 **RESPONSE TO PLANT-AVAILABLE PHOSPHORUS**

3

4 Natacha Bodenhausen<sup>1,2</sup>, Vincent Somerville<sup>1</sup>, Alessandro Desirò<sup>3</sup>, Jean-Claude  
5 Walser<sup>4</sup>, Lorenzo Borghi<sup>5</sup>, Marcel G.A. van der Heijden<sup>1,6,7</sup>, Klaus Schlaeppli<sup>1,8\*</sup>

6

7 1 Division of Agroecology and Environment, Agroscope, Zurich, Switzerland

8 2 Department of Soil Sciences, Research Institute of Organic Agriculture FiBL, Frick,  
9 Switzerland

10 3 Department of Plant, Soil and Microbial Sciences, Michigan State University, East  
11 Lansing, MI, USA

12 4 Genetic Diversity Centre, ETH Zurich, Zurich, Switzerland

13 5 Institute of Plant Biology, University of Zurich, 8008 Zurich, Switzerland

14 6 Institute for Evolutionary Biology and Environmental Studies, University of Zurich,  
15 Zurich, Switzerland.

16 7 Plant-Microbe Interactions, Institute of Environmental Biology, Faculty of Science,  
17 Utrecht University, Utrecht, The Netherlands

18 8 Institute of Plant Sciences, University of Bern, Switzerland

19

20 \*Corresponding author: Klaus Schlaeppli, University of Bern, Institute of Plant

21 Sciences, Altenbergrain 21, 3013 Bern, Tel. +41 31 631 46 36,

22 klaus.schlaeppli@ips.unibe.ch

## 23 **MANUSCRIPT INFORMATION:**

24

25 Word count of the summary: 198

26

27 Total word count of the main text: 6343

28 Introduction: 1294

29 Materials and Methods: 918

30 Results: 2031

31 Discussion: 1989

32 Acknowledgements: 111

33

34 Number of figures: The article comprises 7 main figures, all in color

35 Number of tables: -

36

37 This article comprises the following Supporting information:

38 - Figure S1 | Analysis steps

39 - Figure S2 | Comparison of ITS PCR approaches for plant root samples

40 - Figure S3 | Rarefaction curves for bacterial and fungal OTU richness

41 - Figure S4 | Effects of plant species and P-levels on microbial richness,  
42 diversity and evenness

43 - Figure S5 | Beta-diversity analysis including the soil samples

44 - Figure S6 | Identification of endobacteria by phylogenetic placement

45

46 - Table S1 | Effects of plant species and P treatment on alpha diversity  
47 (ANOVA)

48 - Table S2 | Effects of plant species and P treatment on community composition  
49 (PERMANOVA)

50 - Table S3 | Effects P treatment on species-specific community compositions  
51 (PERMANOVA)

52 - Table S4 | Statistics from identifying phosphate sensitive microbes

53 - Table S5 | Network characteristics

54

55 - Methods S1 | Microbiota profiling and analysis

56

57 - Notes S1 | Comparison of PCR approaches

58 - Notes S2 | Bioinformatic scripts

59 - Notes S3 | Data analysis in R

60 - Notes S4 | Mapping endobacteria

61 - Notes S5 | Comparison of ITS profiling approaches

## 62 SUMMARY

- 63 • Phosphorus (P) is a limiting element for plant growth. Several root microbes,  
64 including arbuscular mycorrhizal fungi (AMF), have the capacity to improve  
65 plant nutrition and their abundance is known to depend on P fertility. However,  
66 how complex root-associated bacterial and fungal communities respond to  
67 changes in P availability remains ill-defined.
- 68 • We manipulated the availability of soil P in pots and compared the root  
69 microbiota of non-mycorrhizal *Arabidopsis* with mycorrhizal *Petunia* plants.  
70 Root bacteria and fungi were profiled using ribosomal operon gene fragment  
71 sequencing, we searched for P sensitive microbes and tested whether a P  
72 sensitive core microbiome could be identified.
- 73 • Root microbiota composition varied substantially by P availability. A P  
74 sensitive core microbiome was not identified as different bacterial and fungal  
75 groups responded to low-P conditions in *Arabidopsis* and *Petunia*. P sensitive  
76 microbes included Mortierellomycotina in *Arabidopsis*, while these were AMF  
77 and their symbiotic endobacteria in *Petunia*. Of note, their P-dependent root  
78 colonization was reliably quantified by sequencing.
- 79 • The species-specific root microbiota dynamics suggest that *Arabidopsis* and  
80 *Petunia* evolved different microbial associations under the selection pressure of  
81 low P availability. This implies that the development of microbial products that  
82 improve P availability requires the consideration of host-species specificity.

83 **KEY WORDS**

84 *Arabidopsis thaliana*, arbuscular mycorrhizal fungi (AMF), endobacteria, *Petunia*

85 *hybrida*, phosphate, root microbiota

## 86 INTRODUCTION

87 Phosphorus (P) presents one of the key nutrients for plant growth. While a small  
88 fraction of soil P is directly available for plant uptake, the larger fraction is complexed  
89 to organic and mineral soil components and therefore inaccessible for plants. The  
90 conventional agronomic solution to increase P availability for plants relies on  
91 supplementing mineral phosphate ( $\text{PO}_4^{3-}$ ). However, yield optimization requires excess  
92 application of phosphate since less than thirty percent of applied P fertilizers effectively  
93 support plant growth, the rest of the applied phosphate readily transforms to plant non-  
94 available P forms (Cordell *et al.*, 2009). Such an overuse causes the rapid depletion of  
95 finite phosphorus reservoirs, is expensive and causes environmental harm, primarily  
96 with negative impacts on the aquatic environment by eutrophication of the surface  
97 water (Cordell *et al.*, 2009; Scholz & Wellmer, 2013; Reijnders, 2014). Therefore, next-  
98 generation agriculture requires novel sustainable solutions that reduce fertilizer inputs  
99 and increase the nutrient-use efficiency while maintaining high plant yields.

100 Numerous root-associated microbes have the capacity to mobilize soil P or  
101 metabolize recalcitrant forms (Gyaneshwar *et al.*, 2002; Jacoby *et al.*, 2017), thereby  
102 enhancing plant performance and agricultural yield especially under nutrient limiting  
103 conditions. For fungi, there is a continuum of functionally similar associations between  
104 different groups of root fungi and their host plant species (van der Heijden *et al.*, 2017).  
105 For instance, arbuscular mycorrhizal or ectomycorrhizal fungi are intimately connected  
106 to plant roots and support plant growth by mobilizing and transporting P from a larger  
107 soil volume and more distant pools of P thanks to their large hyphal network, (Jakobsen  
108 *et al.*, 1992). Aside from these classical mycorrhizal plants, also nonmycorrhizal plants  
109 such as *Arabidopsis thaliana* [hereafter: *Arabidopsis*] and *Arabis alpina* rely on fungal  
110 associations for nutrient acquisition (Cosme *et al.*, 2018). They rely on beneficial fungal  
111 endophytes including *Colletotrichum tofieldiae* (Hiruma *et al.*, 2016), *Serendipita*  
112 *indica* [formerly *Piriformospora indica*] (Yadav *et al.*, 2010) or a fungus of the order  
113 Helotiales (Almario *et al.*, 2017). Typically, the P availability in soil determines to  
114 which extent a plant is colonized by the fungal symbiotic partner with high levels of  
115 colonization under low-P conditions and little colonization in soils with high-P levels.  
116 In addition to fungi, many root bacteria are known to support plant nutrition with their  
117 abilities to solubilize inorganic P or to mineralize organic P (Rodríguez & Fraga, 1999;  
118 Alori *et al.*, 2017). Powerful P solubilizing bacteria include strains from the genera

119 *Bacillus*, *Pseudomonas* and *Rhizobium*; for a more comprehensive list as well as their  
120 growth effects on crops, we refer to Alori *et al.* (2017). While a wide range of individual  
121 rhizosphere microbes is known to support plant P nutrition, the effects of P availability  
122 on the overall root microbiota remains less understood. A deeper understanding of  
123 interactions between plants and their microbial allies in response to the bioavailability  
124 of P is needed for developing microbe-dependent P fertilization solutions (Schlaeppli &  
125 Bulgarelli, 2015; Busby *et al.*, 2017).

126 Interactions among microbes emerge as a critical component for the  
127 maintenance of host-microbial homeostasis and for plant performance (Hassani *et al.*,  
128 2018). Inter-kingdom microbial associations occur in the plant root microbiota as for  
129 instance root fungi hosting endobacteria in their cells (Desirò *et al.*, 2014). Such ancient  
130 fungi-endobacteria interactions (Bonfante & Desirò, 2017) include root fungi of the  
131 Mucoromycota (Spatafora *et al.*, 2017) that host diverse bacterial endosymbionts  
132 related to *Burkholderia* or *Mycoplasma*. An example of *Burkholderia*-related  
133 endobacteria includes *Candidatus Glomeribacter gigasporarum* that is hosted by a  
134 Glomeromycotina fungus (Bianciotto *et al.*, 2003). *Mycoplasma*-related endobacteria  
135 have a broader host range with presence in Glomeromycotina (Naumann *et al.*, 2010),  
136 Mortierellomycotina (Desirò *et al.*, 2018) and Mucoromycotina (Desirò *et al.*, 2015).  
137 The occurrence and functional contribution of fungal endobacteria adds a further level  
138 of complexity to the interactions of plant with and among their associated microbes.

139 Plants are more and more recognized in context with their microbial  
140 communities, where a multitude of microbes collectively function as a microbiome. P  
141 fertilization as well as P depletion are known to induce shifts in soil microbial  
142 communities (Wakelin *et al.*, 2012; Leff *et al.*, 2015; Huang *et al.*, 2016; Bergkemper  
143 *et al.*, 2016; Ikoyi *et al.*, 2018). For example, grassland soil microbes consistently  
144 responded to phosphate inputs with compositional community changes, as for instance  
145 mycorrhizal fungi, oligotrophic bacteria and methanogenic Archaea decreased in  
146 relative abundance with nutrient additions (Leff *et al.*, 2015). While the responses of  
147 soil microbial communities to varying levels of different sources of P have been well  
148 studied, the plant root-associated microbial communities have received less attention  
149 (Silva *et al.*, 2017; Almario *et al.*, 2017; Robbins *et al.*, 2018). Robbins *et al.*, (2018)  
150 investigated the effects of different levels of P fertilization on the *Arabidopsis*  
151 rhizosphere and root microbiota. While phosphate applications had little effects on  
152 microbial diversity, they affected more strongly the plant-associated microbiota

153 compared to bulk soil communities, suggesting plant-mediated cues for structuring the  
154 plant microbiota in response to the nutritional status. The authors noted a weak P-  
155 fertilization effect on root communities that was manifested by low-abundant root-  
156 associated microbes. This suggests P to be a minimal driver in shaping microbial  
157 communities compared to larger drivers such as compartment (soil vs. rhizosphere,  
158 rhizoplane, and roots) or soil type (soils differing chemically, physically and with  
159 regard to their microbiota; Hacquard *et al.*, 2015). The work on model non-mycorrhizal  
160 plants revealed subtle responses of the root microbiota to the availability of soil P;  
161 further work is needed to test whether mycorrhizal plants exhibit stronger root  
162 microbiota responses thanks to their colonizing symbionts.

163 *Petunia x hybrida* [hereafter: *Petunia*] is a model plant that is commonly used  
164 for investigating the symbiosis with arbuscular mycorrhizal fungi (AMF, Wegmüller *et*  
165 *al.*, 2008; Breuillin *et al.*, 2010). Due to its fast life cycle, modest size and the  
166 availability of genetic tools made, *Petunia* is also a model to study plant development  
167 (Vandenbussche *et al.*, 2016), plant nutrition (Liu *et al.*, 2018) and hormonal signaling  
168 (Hamiaux *et al.*, 2012). *Petunia* belongs to the Solanaceae family, thus is related to  
169 tomato, potato and eggplant so that root microbiota knowledge may be transferable to  
170 these staple food crops. We therefore chose *Petunia* in comparison with non-  
171 mycorrhizal *Arabidopsis* to study root microbiota dynamics in response to P availability  
172 in soil and how plants cope with P limiting conditions.

173 In this study, we tested the hypothesis that the composition of the root  
174 microbiota alters depending on the P availability and we asked whether a core  
175 microbiome or plant species-specific microbiomes prevail in response to P deficiency.  
176 We expected the *Petunia* root microbiota to enrich for AMF under low-P conditions,  
177 whereas the *Arabidopsis* response to low-P remained unclear. Hence, while differential  
178 fungal responses were anticipated for the two plant species, we were interested in their  
179 bacterial responses and whether a different sets of bacteria will respond to the varying  
180 levels of P availability. A particular goal of the study was to uncover the interplay  
181 between root bacteria and fungi and we examined their co-occurrence patterns in  
182 response to the varying P availability. We expected to find potential microbial  
183 interactions and hypothesized that the root microbiota data contains paired sequence  
184 information of fungal endobacteria and their corresponding host fungi. A technical goal  
185 of this study was to quantify AMF colonization in the context of whole fungal diversity

186 based on DNA-based sequencing instead of the traditional morphological  
187 quantification by microscopy.

188 This study reveals that root microbiota composition varies markedly by P  
189 availability in soil and that different fungal and bacterial groups are responsive to low-  
190 P conditions in Arabidopsis and Petunia. We find co-abundant groups of candidate  
191 microbial cooperation partners, including AMF and their symbiotic endobacteria, both  
192 known to support plant growth under low-P conditions. Our work suggests that  
193 Arabidopsis and Petunia have evolved individual microbial solutions, involving  
194 multitrophic microbial interactions, to cope with low-P conditions.



## 195 MATERIAL AND METHODS

### 196 PLANT GROWTH

197 The experiment was conducted in 400 ml pots lined with a mesh (Trenn-Vlies,  
198 Windhager, Thalgau, Germany). Soil was collected on April 4<sup>th</sup> 2014 from a field site  
199 (47°26'20" N 8°31'40" E), sieved to 2 mm and stored at 4°C until use. Soil was mixed  
200 1:1 volume with sterilized quartz-sand. Chemical properties of the sand-soil mixture  
201 were analyzed at the Labor für Boden- und Umweltanalytik (Eric Schweizer AG, Thun,  
202 Switzerland): pH 6.8, 6/31/51% (clay/silt/sand) and 1.4/1.05/1.07 mg kg<sup>-1</sup> (water-  
203 extractable N/P/K).

204 Petunia seeds were surface sterilized with 70% ethanol, washed with autoclaved  
205 water and plated on 1/2 strength Murashige and Skoog basal medium (Sigma, Buchs,  
206 Switzerland) supplemented with 1.5% sucrose and solidified with 1.5% agar. Plants  
207 were germinated under long-day conditions (16-h photoperiod) in climate chamber  
208 (Sanyo MLR-352H; Panasonic, Osaka, Japan) at 25°C and 60% relative humidity.  
209 After 7 days, seedlings were transferred to 400 ml pots filled with substrate. Plants were  
210 grown for two weeks in the same climate chamber then moved to an in-house climate  
211 chamber with same humidity, photoperiod and temperature. Plants were fertilized with  
212 a corrected Petunia nutrient solution (Reddy *et al.*, 2007), prepared with three  
213 concentrations of phosphate: 0.03 mM KH<sub>2</sub>PO<sub>4</sub> (low-P), 1 mM KH<sub>2</sub>PO<sub>4</sub> (medium-P)  
214 and 5 mM KH<sub>2</sub>PO<sub>4</sub> (high-P). Each plant received 300 ml of the solution over the last  
215 six weeks before harvest. We conducted two separate experiments using the same  
216 treatments and growth conditions, the first to collect the plant root samples (DNA  
217 analyses and microscopy) and shoot biomass and a second experiment to quantify leaf  
218 nutrient levels.

### 219 SAMPLE COLLECTION

220 Plants were harvested at 10 weeks. The roots were separated from the shoot  
221 with a clean scalpel. The shoots were dried in a 60° C oven for dry weight analysis. The  
222 loosely attached soil was shaken from the roots, the roots were washed three times in  
223 PBS buffer (approximately 10 ml for 1 g of fresh weight) and then split into two  
224 equivalent subsamples. Samples for DNA extraction were stored at -80°C until  
225 processing. Samples for microscopy were stored in 50% ethanol. After staining with  
226 pen ink (Vierheilig *et al.*, 1998), root length colonization was determined using the

227 magnified intersections method for 100 intersections per sample (McGonigle *et al.*,  
228 1990). Soil from unplanted pots was collected by removing the top 1 cm layer and then  
229 mixing the soil below, one sample (250 mg - 500 mg) was taken from each pot.  
230 The dried shoots were weighed and milled. P and K concentrations were analyzed using  
231 inductively coupled plasma-optical emission spectroscopy (ICP-OES) at the elemental  
232 analytic department of Agroscope according to (VDLUFA-Verlag, 2006).

### 233 *MICROBIOTA PROFILING*

234 The protocol for microbiota profiling, including DNA extraction, PCR,  
235 sequencing and bioinformatics, is described in detail in **Methods S1**. The comparison  
236 of the PCR approaches is reported in **Notes S1**, which contains the bioinformatic script,  
237 input data, analysis script and the markdown report. The bioinformatic analysis of the  
238 main samples of the study is documented with the scripts, parameters, support and  
239 report files in **Notes S2**. The raw sequencing data of the MiSeq runs and the SMRT  
240 sequencing are available from the European Nucleotide Archive ENA under the study  
241 accession PRJEB27162.

### 242 *STATISTICAL ANALYSES*

243 Statistical analyses were performed using R v3.3.2 (R Core Team, 2016) within  
244 Rstudio (RStudio Team, 2015). The effects of P availability on dry weight, P content  
245 and K content were assessed with a linear model. Dry weight data was log-transformed  
246 to satisfy the assumptions of the linear model (normality of residuals and  
247 homoscedasticity). To test for the effect of P availability on AMF colonization, a  
248 generalized linear model was fitted with quasibinomial distribution to account for  
249 overdispersion. Rarefaction curves were prepared with the function ‘rarecurve’ from  
250 vegan (Oksanen *et al.*, 2018). For alpha diversity, the data was rarefied to 15’000  
251 sequences 500 times. For each subsample, several diversity indices were estimated:  
252 richness (S) is the number of OTUs, H is the Shannon index from which  $D=\exp(H)$  was  
253 calculated (Jost, 2007), and Sheldon evenness is  $E= \exp(H)/S$  (Sheldon, 1969).  
254 ANOVA was used to assess the effect of P a and plant species on the mean of the 500  
255 subsamples for each sample. For the rest of the analysis, the data was filtered (at least  
256 4 sequences per sample in 4 samples) to remove low abundant OTUs. The effects of P  
257 availability and plant species on community composition were assessed with  
258 permutational multivariate analysis of variance (PERMANOVA) of Bray-Curtis  
259 dissimilarities and visualized with principal coordinate analysis (PCoA) using vegan

260 and phyloseq (McMurdie & Holmes, 2013). The effect of P availability on abundance  
261 of each OTU was investigated with edgeR (Robinson *et al.*, 2010) on TMM-normalized  
262 data (Robinson & Oshlack, 2010) and visualized with ternary plots. TMM-normalized  
263 data was used to calculate Spearman rank correlations between OTUs for co-occurrence  
264 networks. Positive ( $\rho > 0.7$ ) and significant relationships ( $P < 0.001$ ) were visualized with  
265 igraph (Csardi & Nepusz, 2006). Scripts, functions and support files are available as  
266 **Notes S3**. **Figure S1** visualizes the workflow of the analysis steps.

#### 267 *IDENTIFICATION OF ENDOBACTERIA*

268 We describe the identification of endobacteria OTUs using a phylogenetic  
269 placement approach in **Methods S1**. Briefly, we pre-selected candidates in the  
270 microbiome dataset using two approaches and then validated their representative  
271 sequences by fine mapping to a reference tree of known endobacteria sequences. The  
272 first approach was based on sequence clustering and for the second, we employed co-  
273 occurrence characteristics from network analysis. Command line and analysis code in  
274 R (including markdown report) as well as the database with curated endobacteria  
275 16S rDNA reference sequences are available as **Notes S4**.

## 276 RESULTS

### 277 EXPERIMENTAL SETUP FOR MANIPULATING PHOSPHATE LEVELS

278 We investigated the dynamics of the root-associated microbiota to the  
279 availability of soil P and compared the non-mycorrhizal model species *Arabidopsis* to  
280 *Petunia*, which forms symbiosis with AMF. Plants were sown in a field soil that was  
281 amended with sand and we manipulated soil P availability by applying low, medium or  
282 high levels of phosphate. Unplanted pots were included as controls to collect soil  
283 samples. We first confirmed the effectiveness of the applied phosphate levels and found  
284 that phosphate treatments positively affected plant growth (**Fig. 1a**), increased P levels  
285 in plant leaves (**Fig. 1b**), while reducing the AMF colonization levels in *Petunia* roots  
286 (**Fig. 1c**). As we manipulated soil P levels using simple K salts, we tested if the low-P  
287 condition would also be limited in potassium. Since the plants growing in low-P  
288 conditions were sufficiently supplied with K (**Fig. 1d**), we concluded that the simple  
289 approach of using  $\text{KH}_2\text{PO}_4^{3-}$  solutions permitted to establish a P gradient without  
290 causing K limiting conditions.

### 291 PROFILING SOIL AND ROOT MICROBIAL COMMUNITIES

292 First, we evaluated the following PCR approaches to profile root fungal  
293 communities: ITS1F and ITS2 (McGuire *et al.*, 2013a), fITS7 and ITS4 (Ihrmark *et al.*,  
294 2012a) and ITS1F with the reverse complement of fITS7. Community profiles were  
295 inspected for the proportions of plant and AMF sequences as well as for fungal  
296 diversity. We selected ITS1F and ITS2, because this PCR approach captured low levels  
297 of plant sequences at good coverage of AMF and highest levels of taxa richness (**Fig.**  
298 **S2**, See **Notes S1** for a detailed comparison of the PCR approaches).

299 We then characterized soil and plant root-associated bacterial and fungal  
300 communities by sequencing amplicons of the 16S rRNA gene and the internal  
301 transcribed spacer (ITS) region 1, respectively. We obtained 2'196'310 high-quality  
302 bacteria sequences with a median of 36'718 sequences per sample and 3'809'350 high-  
303 quality fungal sequences with a median of 54'337 sequences per sample. Bacterial and  
304 fungal sequences clustered into 3'701 bacterial operational taxonomic units (bOTUs)  
305 and 1'688 fungal OTUs (fOTUs), respectively.

306 Soil bacteria comprised abundant Acidobacteria, Actinobacteria, Firmicutes,  
307 Deltaproteobacteria and Verrucomicrobia, whereas plant roots were mainly colonized

308 by Betaproteobacteria, Gammaproteobacteria and Bacteroidetes (**Fig. 2**). The bacteria  
309 community composition at Phylum rank was not markedly different between  
310 Arabidopsis and Petunia.

311 For fungi, Ascomycota and Basidiomycota were abundant in soil and Petunia  
312 root samples (**Fig. 2**). Mortierellomycotina were particularly abundant in soil fungal  
313 communities, whereas a high number of Glomeromycotina was found in Petunia roots,  
314 which varied as a function of the applied phosphate levels. Consistent with the levels  
315 of AMF root colonization measured by microscopy (**Fig. 1c**), Glomeromycotina were  
316 most abundant in Petunia roots under low-P conditions and decreased in proportion  
317 with increasing P availability (**Fig. 3a**). The cumulative relative abundance of  
318 Glomeromycotina sequences was significantly positively correlated (adj.  $R^2 = 0.59$ ;  $P$   
319  $< 0.001$ ) with the rate of AMF root colonization as assessed by microscopy (**Fig. 3b**).  
320 We noted that the root fungal community of Arabidopsis was dominated by sequences  
321 belonging to Olpidiomycotina. Most of these sequences belonged to fOTU1 (assigned  
322 to *Olpidium brassicae*), which accounted for 94.50% of the sequences in Arabidopsis  
323 but only 0.79% of the sequences in Petunia samples. To exclude that this is a technical  
324 peculiarity of MiSeq, we confirmed the dominance of *O. brassicae* by sequencing the  
325 entire ITS region (PCR primers ITS1F and ITS4) using SMRT sequencing (**Fig. 2c**).  
326 We refer to the **Notes S5** for the detailed comparison of the sequencing approaches. In  
327 brief, the SMRT-sequencing based community profiles also avoided amplifying plant  
328 sequences while abundantly capturing the AMF. Both methods have their inherent  
329 technical advantages with the MiSeq approach offering enhanced throughput and  
330 sampling depth, whilst the SMRT-sequencing method provides enhanced taxonomic  
331 resolution. Albeit a few quantitative differences, the two approaches reproduce overall  
332 similar taxonomic compositions and revealed remarkably similar biological patterns  
333 (**Notes S5**).

#### 334 PHOSPHATE INDUCED VARIATION IN MICROBIAL DIVERSITY

335 In the following, we used the MiSeq-based fungi profiles as they were obtained  
336 using the same sequencing platform as the bacteria and because of the enhanced  
337 sequencing depth. Bacteria and fungi richness was highest in unplanted soil, followed  
338 by Petunia and then Arabidopsis roots (**Fig. S3**). ANOVA confirmed the effect of plant  
339 species on alpha diversity for both bacteria and fungi and further uncovered an effect  
340 by the different P availability on the bacteria community (**Fig. S4, Table S1**). Bacterial

341 richness, diversity and evenness were generally higher in Petunia compared to  
342 Arabidopsis and generally increased with increasing P concentrations. With the  
343 dominance of *O. brassicae*, fungal richness, diversity and evenness were markedly  
344 lower in Arabidopsis compared to Petunia.

345 Utilizing principal coordinate analysis (PCoA) of Bray-Curtis dissimilarities,  
346 we found compositional differences in microbial communities due to the tested  
347 experimental factors sample type, plant species and P availability (**Fig. 4**). Consistent  
348 with previous work (Bulgarelli *et al.*, 2012; Hartman *et al.*, 2018), bacteria and fungi  
349 differed markedly between the sample types of unplanted soil and roots (**Fig. S5**). With  
350 regard to plant species, fungal communities were more divergent between Arabidopsis  
351 and Petunia roots compared to bacteria communities (**Fig. 4**), possibly reflecting their  
352 opposite behavior with AMF. Permutational multivariate analysis of variance  
353 (PERMANOVA), finding significant plant species effects on both bacterial and fungal  
354 communities (**Table S2**), confirmed that plant species explained more variation for  
355 fungi (53% of variation) compared to bacteria (14%).

356 The effects of P availability were apparent in bacterial communities of both  
357 Arabidopsis and Petunia by clustering following the gradient in phosphate levels (**Fig.**  
358 **4A**), whereas for fungi, this was only manifested in Petunia (**Fig. 4B**). PERMANOVA  
359 confirmed a significant P availability effect for the bacteria (**Table S2**). To approximate  
360 the effect sizes of P availability on the Petunia and Arabidopsis root microbial  
361 communities, we inspected the R<sup>2</sup> values of PERMANOVA applied to the data of each  
362 plant separately. While P availability explained 14.1% and 13.3% of variation in  
363 Petunia root bacterial and fungal communities, respectively, it accounted for 15.0% and  
364 21.7% of variation in the Arabidopsis root microbial communities (**Table S3**). This  
365 indicates that varying P availability in soil can account for about 15% of variation in  
366 plant root microbiota composition.

#### 367 *IDENTIFYING PHOSPHATE SENSITIVE MICROBES*

368 Next, we identified P sensitive OTUs – OTUs being differentially abundant  
369 between low and high-P conditions – using edgeR (Robinson *et al.*, 2010). In total we  
370 found 2.2% bOTUs and 6.3% fOTUs responsive to the varying P availability in Petunia,  
371 while 3.1% bOTUs and 13% fOTUs were sensitive in Arabidopsis (**Fig. 5a, Table S4**).  
372 With the exception of four bOTUs, different sets of P sensitive bacteria and fungi OTUs  
373 were found for Arabidopsis and Petunia, suggesting that the two plant species have

374 differential microbial responses to low-P conditions. Among the four shared bOTUs  
375 was a prominent *Dechloromonas* sp. (bOTU2), which is more abundant under low-P  
376 conditions in both plant species (**Fig. 5b**). Bacteria from different taxonomic lineages  
377 were abundant under low or high-P conditions (**Table S4**). The most abundant  
378 Arabidopsis root bacteria included also Burkholderiales, Bdellovibrionales and  
379 Rhodocyclales under low-P conditions, whereas taxa from the Chthoniobacterales,  
380 Planctomycetales and Verrucomicrobiales were enriched under high-P conditions.  
381 Under low-P conditions, the abundant Petunia root bacteria included members of the  
382 Burkholderiales and Rhodocyclales, whereas under high-P conditions, a slightly  
383 different set of bacteria, including a *Flavobacterium* sp. (Flavobacteriales), a *Tahibacter*  
384 sp. (Xanthomonadales) and members of the Verrucomicrobiales were abundant.  
385 Examples of highly abundant and low-P specific Burkholderiales and Rhodocyclales  
386 members include a *Dechloromonas* sp. (bOTU2) and a *Candidatus Accumulibacter*  
387 (bOTU13, **Fig. 5b**). Among the Petunia root bacteria, which are enriched under low-P  
388 conditions, we noticed an bOTU assigned to *Candidatus Glomeribacter gigasporarum*  
389 (bOTU134, **Fig. 5b**), which presents an endobacterium associated with lineages in the  
390 AMF family Gigasporaceae (Bianciotto *et al.*, 2003).

391 Similar to bacteria, different fungal lineages responded to low or high-P  
392 conditions in Arabidopsis and Petunia (**Table S4**). In Arabidopsis, besides many low  
393 abundant and often taxonomically poorly resolved fungi, the distinct group of  
394 Mortierellomycotina (e.g., fOTU7, **Fig. 5c**) was enriched under low-P conditions.  
395 Under high-P conditions, the abundant fungi *O. brassiceae* (Olpidiales, fOTU2, **Fig.**  
396 **5c**), *Hygrophoraceae* sp. (Agaricales, fOTU10) and *Cadophora* sp. (Helotiales,  
397 fOTU14) were found besides numerous low abundant fOTUs. While in Petunia only a  
398 handful of diverse and low abundant fungi were enriched under high-P conditions, we  
399 found a large group of 28 mycorrhizal fOTUs enriched in the low-P treatment (**Table**  
400 **S4**). These mycorrhizal fOTUs belonged mostly to the order Glomerales and included  
401 numerous abundant members such as *Funneliformis* and *Glomus* spp. (e.g., fOTU6 in  
402 **Fig. 5c**).

#### 403 PHOSPHATE-INDUCED DYNAMICS IN MICROBIAL ABUNDANCE

404 Finally, we utilized co-occurrence network analysis to find pairs or groups of  
405 microbes with a similar abundance behavior along the gradient of plant-available P.  
406 Co-abundance presents a pre-requisite for cooperation among microbes and we

407 speculated to identify possible candidate cooperation partners that may contribute to  
408 support plant growth under low-P conditions. **Figure 6a** visualizes the significant  
409 positive pairwise correlations between root microbiota members (bOTU-bOTU, fOTU-  
410 fOTU and bOTU-fOTU) of *Petunia* and *Arabidopsis* growing in conditions with low,  
411 medium or high-P availability. We then partitioned the network into discrete  
412 community modules and mapped the P-sensitive bOTUs and fOTUs into the network  
413 and modules. While we did not find groups of co-occurring OTUs (=modules) that were  
414 responsive to high-P conditions, we found two major modules, ‘M1’ and ‘M26’, that  
415 comprised high proportions of P-responsive OTUs (**Fig. 6b**) being specifically  
416 abundant under low-P conditions (**Fig. 6c**). The module ‘M1’ comprised only bacteria,  
417 mainly belonging to the Betaproteobacteria orders Burkholderiales and Rhodocyclales  
418 (**Table S5**). In contrast, the module ‘M26’ grouped a set of five taxonomically diverse  
419 bacteria lineages with a large set of fOTUs primarily belonging to the order Glomerales  
420 (**Table S5**). These fOTUs represented almost all AMF fOTUs in the dataset (**Table S5**)  
421 and interestingly, they co-occurred with the *Candidatus* Glomeribacter bOTU134.

422 The same analysis was conducted for *Arabidopsis* and revealed a module ‘M27’  
423 with co-occurring bacteria and fungi OTUs that were specifically abundant under high-  
424 P conditions (**Fig. 6, Table S5**). This module grouped diverse bacteria members  
425 including Planctomycetes and Verrucomicrobia and a diverse set of fungi. The module  
426 ‘M19’ held low abundant and taxonomically diverse bacteria and fungi that favored  
427 intermediate P-levels. The module ‘M4’ comprised abundantly co-occurring bacteria  
428 and fungi under low-P conditions, belonging mainly to diverse Proteobacteria and  
429 Ascomycota or unknown fungi, respectively. With the exception of a few bacteria, the  
430 low-P responsive modules of *Arabidopsis* and *Petunia* had specific compositions (**Fig.**  
431 **6d**), which is consistent with the species-specific root microbiota dynamics to low-P  
432 condition.

433 Microbes that simultaneously co-occur with many others are often referred to  
434 keystone taxa as they may play an important ecological role by determining community  
435 dynamics and microbiome functioning (Banerjee *et al.*, 2018). We identified keystone  
436 OTUs, defined based on their high degree of co-occurrence, for the *Arabidopsis* and  
437 *Petunia* root microbiota networks (**Table S5**). While all *Arabidopsis* keystone OTUs  
438 belonged to the high-P module ‘M27’, we found keystone OTUs in the low-P  
439 responsive module ‘M26’ of *Petunia*. These low-P responsive keystone OTUs were the  
440 Glomeromycotina fOTU6 and fOTU111 as well as fOTU109 of unknown taxonomy.



441 *ENDOBACTERIA*

442       To understand whether bacterial communities associated with the Arabidopsis  
443 or Petunia root microbiota could include fungal endobacteria, we aligned candidate  
444 bOTU sequences to a database of curated endobacteria sequences (see methods).  
445 Phylogenetic placement confirmed bOTU134 as *Candidatus* Glomeribacter closely  
446 related to one hosted in *Scutellospora pellucida* (**Figs. 7a, S6, S7**). In addition, we  
447 identified two bOTUs (330 and 778) mapping to *Mycoplasma*-related endobacteria  
448 identified in the AMF species *Claroideoglossum claroideum* and *C. etunicatum*,  
449 respectively. Although these two bOTUs do not belong to the ‘AMF module M26’ of  
450 Petunia, they were, similar to bOTU134, significantly higher in abundance under low-  
451 P conditions (**Table S3**). Phylogenetic placement analysis revealed six additional  
452 *Burkholderia*- and two *Mycoplasma*-related endobacteria OTUs (**Figs. 7, S6**), however  
453 as they were detected with only a handful of reads in a few samples, we did not include  
454 them for network analysis (see **Notes S4** for details). The use of microbiota network  
455 characteristics was generally not indicative for identifying endobacteria OTUs, by  
456 contrast the clustering-based approach proved to function well (**Figs. S6, S7, Notes S4**).  
457 In summary, the combined sequencing of bacteria and fungi permitted to identify three  
458 endobacteria OTUs that had a consistent abundance behavior with their mycorrhizal  
459 hosts along the P-gradient.

## 460 DISCUSSION

461 In this study, we revealed the dynamics of the root microbiota of non-  
462 mycorrhizal *Arabidopsis* and mycorrhizal *Petunia* plants along a gradient of plant-  
463 available P in soil. We demonstrate that the composition of the root microbiota alters  
464 depending on P availability and we revealed species-specific microbial patterns in  
465 response to low-P conditions. Under low-P conditions, we confirmed a substantial  
466 colonization by AMF in *Petunia* together with numerous bacteria of the Burkholderiales  
467 and Rhodocyclales, whereas *Arabidopsis* roots hosted mainly Mortierellomycotina  
468 fungi and abundant bacteria from the Burkholderiales, Bdellovibrionales and  
469 Rhodocyclales. However, the root microbiota of the two plants contained different  
470 members (bOTUs) of these taxonomic lineages. These groups of P-sensitive microbes  
471 responded simultaneously to the different levels of P availability. Among these co-  
472 occurring microbes, we found fungal endobacteria and their corresponding hosts,  
473 presenting a well-known example of highly specific multitrophic microbial  
474 interactions.

### 475 ENDOBACTERIA

476 To our knowledge, this is the first report to identify endobacteria of  
477 Mucoromycotina in a plant microbiota study. Above all, the experimental design with  
478 low- to high-P conditions was instrumental to become aware of fungal endobacteria in  
479 the dataset. A first hint for the presence of endobacteria came from the statistical  
480 approach to find differentially abundant bOTUs between low and high-P conditions,  
481 revealing the enrichment of a *Candidatus* Glomeribacter OTU under low-P conditions  
482 (**Fig. 5b**). Of note, bOTU134 was almost overlooked, as a reliable taxonomy  
483 assignment (confidence >0.7) was only available down to family level, while the deeper  
484 data exploration indicated a link with endobacteria (genus-level assignment was  
485 ‘*Candidatus* Glomeribacter’, confidence 0.34). The second hint that pointed to  
486 endobacteria and their hosts were the co-abundance patterns, which grouped bOTUs  
487 including *Candidatus* Glomeribacter bOTU134 with numerous Glomeromycotina  
488 fOTUs (**Table S5**). Here again, experimental design was instrumental because the co-  
489 occurrence analysis groups microbes with similar abundances in samples from low- to  
490 high-P conditions. Finally, we relied on phylogenetic placement to confirm that  
491 bOTU134 represents a *Candidatus* *Glomeribacter*, which is phylogenetically related to  
492 a previously isolated exemplar from the AMF species *Scutellospora pellucida* (**Fig. 7**).

493           The identification of bOTU134 as a fungal endobacterium prompted us to  
494 search for additional potential endobacteria in the Arabidopsis or Petunia root  
495 microbiota. We compared two strategies, co-occurrence characteristics and sequence  
496 similarity to known endobacteria, for their usefulness to identify endobacteria from root  
497 microbiota data. For the co-occurrence characteristics strategy, we selected all bOTUs  
498 that significantly co-occurred with fOTUs from lineages known to host endobacteria,  
499 and then placed the resulting 129 candidate bOTUs into the endobacteria reference tree.  
500 For the second strategy, we clustered all sequences of the curated endobacteria database  
501 with all representative bOTU sequences of the microbiota dataset, and then placed the  
502 resulting 22 candidate bOTUs with the highest sequence similarity into the  
503 endobacteria reference tree. Overall, in addition to bOTU134, two abundant (bOTUs  
504 330 and 778) and 8 low-abundant endobacteria OTUs were identified (**Notes S4**).  
505 Moreover, the relative abundance of the three OTUs along the P-gradient was  
506 consistent with the one of their fungal hosts (**Table S4**). While both approaches  
507 identified bOTUs 134 and 778, the clustering-based approach functioned more  
508 efficiently as also low abundant candidates were identified.

509           There are probably multiple reasons why endobacteria and their hosts were  
510 largely neglected in microbiota studies so far. Reasons include the low taxonomic  
511 resolution of short-read community data or the underrepresentation of reference  
512 endobacteria sequences in commonly used taxonomy databases. Here, only the  
513 combined sequencing of bacteria and fungi together with the dedicated experimental  
514 design to manipulate the abundance pattern of fungal hosts and the curated endobacteria  
515 database permitted to identify endobacteria OTUs. Our study demonstrates that  
516 microbiota and/or metagenomic datasets represent useful tools to investigate  
517 endobacterial–fungal interactions in their true ecological context. Possibly, such  
518 cultivation-independent methods can point to further endobacterial–fungal  
519 partnerships. Since endobacteria are ecologically relevant for the fitness of their (plant-  
520 associated) fungal hosts (Salvioli *et al.*, 2016; Uehling *et al.*, 2017; Desirò *et al.*, 2018),  
521 they may also relay some benefits or detriments to the host plant of the fungus  
522 (Bonfante & Desirò, 2017). Hence, mycorrhizal plants, their colonizing fungi along  
523 with their endobacteria form an entity of a multi-kingdom symbiosis. As put forward  
524 by the holobiont concept (Vandenkoornhuys *et al.*, 2015), the importance of multi-  
525 kingdom microbe-microbe interactions for plant performance is not only true for  
526 endobacteria and their fungal hosts but also in general between root bacteria and root

527 fungi. For instance, root bacteria are essential to protect plants against pathogenic root  
528 fungi (Durán *et al.*, 2018).

#### 529 *QUANTIFYING AMF IN PLANT ROOTS*

530 Although specific sequencing methods to quantify AMF in plant roots (Öpik *et al.*,  
531 2009; Schlaeppi *et al.*, 2016) are available, we sought to establish a sequencing-  
532 based approach to assess AMF in plant roots in the context of the whole fungal  
533 diversity. In the search for a PCR approach that avoided amplification of plant ITS  
534 sequences, we also wanted that AMF would be well captured in plant roots unlike other  
535 plant root-fungi profiling methods (Ihrmark *et al.*, 2012b; Hartman *et al.*, 2018). The  
536 Illumina approach by McGuire *et al.* (2013b), although reporting soil fungal profiles,  
537 indicated that PCR primers ITS1F and ITS2 would permit to abundantly capture AMF  
538 and this approach turned out to be successful on plant roots, too (**Fig. S2**).

539 Prior to community sequencing, we had evaluated the effectiveness of our  
540 experimental P availability gradient by confirming that AMF abundantly colonize  
541 *Petunia* roots under low-P but not under high-P conditions (**Fig. 1c**). We performed this  
542 quality control using the traditional ‘magnified intersection’ (McGonigle *et al.*, 1990)  
543 microscopy method on equivalent subsamples as the ones that were used for the  
544 sequencing. The microscopy method relies on staining cleared roots, interpreting and  
545 enumerating the different fungal structures following a defined counting scheme under  
546 the microscope. Compared to the sequencing-based quantification of AMF in plant  
547 roots, the microscopy method appears disadvantageous as it is prone to operator-to-  
548 operator variation, is time consuming and lacks throughput, discrimination between  
549 AMF species as well as the context of the whole fungal diversity. Nevertheless, we  
550 found a reliable agreement between the two methods with a significant positive  
551 correlation (**Fig. 3b**). In summary, the MiSeq-based community profiling approach  
552 with the PCR primers ITS1F and ITS2 avoided amplification of plant ITS sequences,  
553 abundantly displayed the AMF and independently reproduces AMF colonization  
554 patterns of plant roots.

#### 555 *AMF AS KEYSTONE SPECIES*

556 Keystone taxa are thought to own central positions in microbial networks, with  
557 many links to other species; therefore, they may play important ecological roles by  
558 determining community dynamics and microbiome functioning (Banerjee *et al.*, 2018).  
559 AMF were postulated to be keystone species (van der Heijden & Hartmann, 2016) and

560 indeed, we find two Glomeromycotina OTUs (fOTU6 and fOTU111) as being  
561 keystones in the low-P responsive Petunia module ‘M26’ (**Fig. 6**). Technically, the two  
562 Glomeromycotina OTUs fulfilled the network-based criteria defining keystone OTUs  
563 – keystone OTUs have high degree of co-occurrence, high closeness centrality and low  
564 betweenness centrality (Banerjee *et al.*, 2018). The two identified keystone OTUs have  
565 high degrees of co-occurrence implying they are co-abundant with many other (mostly  
566 Glomeromycotina) OTUs in the network. However, with regard to these network-  
567 topology based criteria, there is a major caveat linked to Glomeromycotina fungi:  
568 several Glomeromycotina species have particularly high intraspecies genetic diversity  
569 at the rRNA operon (Stockinger *et al.*, 2010; Lekberg *et al.*, 2014) and, as a  
570 consequence, these fungi require multiple OTUs (at >97% sequence identity) to  
571 represent a single species. For example, three OTUs described the AMF *Rhizoglossum*  
572 *irregulare* (Schlaeppli *et al.*, 2016). Therefore, multiple OTUs per fungal species  
573 artificially inflate the number of co-occurring OTUs for an AMF species (the 3 OTUs  
574 of *R. irregulare* will consistently co-occur with each other). While we agree that AMF  
575 fulfil a key role in root microbiome functioning and this is especially true under low-P  
576 conditions, we anticipate that the mathematical criteria for identifying AMF keystones  
577 from network data may need to be improved and validated using functional analyses.  
578 Instead of assigning keystone status to some pseudo-replicated sequence groups (e.g.,  
579 the 3 OTUs for *R. irregulare*) based on network topology, we rather favor the idea of  
580 empirically nominate keystone microbes because of their known key function(s) in a  
581 given condition (e.g., low-P availability).

#### 582 *OLPIDIUM BRASSICAE*

583 The root microbiota of Arabidopsis but not Petunia, whether profiled with  
584 MiSeq or SMRT-sequencing, comprised abundant sequences assigned to *O. brassicae*,  
585 which is a common root-infecting fungal pathogen of *Brassicaceae* plants (Lay *et al.*,  
586 2018). As biotrophic fungus, *O. brassicae* does not cause tissue maceration. Although  
587 the Arabidopsis roots were without signs of disease when harvested, we learned after  
588 the community sequencing that the fungus had spread in the root tissue. Nevertheless,  
589 such dominance of *O. brassicae* OTUs was observed in previous studies (Tkacz *et al.*,  
590 2015; Durán *et al.*, 2018; Lay *et al.*, 2018). Similar to our study, Lay *et al.* (2018)  
591 examining canola, wheat and pea roots, also found a Brassicaceae-specific enrichment  
592 of an *O. brassicae* OTU. Because these findings originate from different Brassicaceae

593 species and different soil types, we consider the dominance of *O. brassicae* in  
594 Arabidopsis roots in our study rather a true biological observation than a technical  
595 artifact. Although, we confirmed this observation with SMRT sequencing, we cannot  
596 fully exclude that the frequent amplification of *O. brassicae* OTUs may be linked to  
597 the PCR primer ITS1f, as all these studies target the ITS1 region and have the use of  
598 ITS1 or ITS1f PCR primers in common.

#### 599 *P-SENSITIVE MICROBIOTA*

600 We found species-specific microbial patterns in response to low-P conditions  
601 consisting of abundant Mortierellomycotina and Glomeromycotina fungi in  
602 Arabidopsis and Petunia, respectively (**Fig. 5, Table S4**). Similar to the functioning of  
603 AMF in plant P provision, there are some reports that *Mortierella* spp. support P  
604 nutrition of plants (Alori *et al.*, 2017). Although represented by different sequence  
605 groups, bacteria of the Burkholderiales and Rhodocyclales were abundant in both  
606 species. Bacteria of both orders, including members that attach to AMF hyphae, are  
607 well known for their ability to solubilize and mobilize P (Sharma *et al.*, 2013; Taktek  
608 *et al.*, 2015; Alori *et al.*, 2017). *Candidatus Accumulibacter* being abundant in Petunia  
609 under low-P conditions (bOTU13, **Fig. 5b**) as well as the *Dechloromonas* sp. (bOTU2,  
610 enriched in low-P, both plant species) are both intriguing root bacteria, as they are  
611 capable of polyphosphate metabolism, which has been implicated in stress response to  
612 low nutrients in the environment (Rao & Kornberg, 1996; Flowers *et al.*, 2013). In  
613 summary, it appears that non-mycorrhizal Arabidopsis and mycorrhizal Petunia rely on  
614 different microbial associations to cope with low-P conditions.

615 We revealed species-specific and in contrast to Robbins *et al.* (2018), we found  
616 marked root microbiota dynamics of the two plants along a gradient of plant-available.  
617 A plausible reason for stronger P effects on the root microbiota is that our approach  
618 created stronger P limiting conditions (1.05 mg P kg<sup>-1</sup> soil) compared to the low-P  
619 control soil (P1, did not receive phosphate amendments over the last 65 years) of the  
620 long-term P fertilization experiment studied by Robbins *et al.* (2.3 mg P kg<sup>-1</sup> soil, values  
621 are directly comparable as they were analyzed in the same professional soil laboratory  
622 with the same method). Moreover, we established a steeper gradient between low and  
623 high-P conditions with a P availability of ~113 mg P kg<sup>-1</sup> soil as high-P condition  
624 compared to ~12 mg P kg<sup>-1</sup> by Robbins *et al.* (2018). The stronger P limiting conditions  
625 in our study were also reflected in the different rosette biomass data in both studies as

626 we find a twofold reduction in median rosette biomass whereas they measured at  
627 maximum a 1.5x effect in low-P soils.

628 *CONCLUDING REMARKS*

629         The analysis of root microbiota dynamics of Arabidopsis and Petunia to low-P  
630 conditions revealed a number of plant-species specific root microbes that are  
631 preferentially selected at low soil P availability. With regard to agricultural  
632 applications, this works suggests that for supporting different plant species in P  
633 nutrition, different P-solubilizing and/or mineralizing bacteria strains are needed.  
634 Possibly this explains the high context dependency of successful field applications with  
635 P-solubilizing and/or mineralizing bacterial products.

636 **ACKNOWLEDGEMENTS**

637 We acknowledge A. Held (Agroscope) for support in amplicon library preparation. We  
638 thank Prof. D. Reinhardt from the University of Fribourg for Petunia seeds. We thank  
639 Drs. M. Zuber and D. Bürge from Agroscope for the analysis of the leaf nutrient content  
640 and soil chemical properties. We thank Drs. L. Poveda and A. Patrignani from the  
641 Functional Genomics Center in Zürich for technical support in MiSeq- and SMRT-  
642 sequencing, respectively. We acknowledge input for edgeR analysis from Dr. C.  
643 Soneson and Prof. M. Robinson from the University of Zürich. This study was  
644 supported by the Swiss State Secretariat for Education, Research and Innovation with  
645 a project C14.0132 granted to KS and MvdH.

646

647 **AUTHOR CONTRIBUTIONS**

648 NB, MvdH and KS designed the experiments. NB performed the experiment, did the  
649 molecular work and analyzed the data. JCW, VS, AD and KS contributed to data  
650 analysis. NB, LB, MvdH and KS wrote the manuscript. All authors approved the final  
651 manuscript.



652 **REFERENCES**

- 653 **Almario J, Jeena G, Wunder J, Langen G, Zuccaro A, Coupland G, Bucher M.**  
654 **2017.** Root-associated fungal microbiota of nonmycorrhizal *Arabis alpina* and its  
655 contribution to plant phosphorus nutrition. *Proceedings of the National Academy of*  
656 *Sciences* **114**: E9403–E9412.
- 657 **Alori ET, Glick BR, Babalola OO.** **2017.** Microbial Phosphorus Solubilization and  
658 Its Potential for Use in Sustainable Agriculture. *Frontiers in microbiology* **8**: 13.
- 659 **Banerjee S, Schlaeppi K, Heijden MGA.** **2018.** Keystone taxa as drivers of  
660 microbiome structure and functioning. *Nature Reviews Microbiology* **15**: 1.
- 661 **Bergkemper F, Schöler A, Engel M, Lang F, Krüger J, Schloter M, Schulz S.**  
662 **2016.** Phosphorus depletion in forest soils shapes bacterial communities towards  
663 phosphorus recycling systems. *Environmental Microbiology* **18**: 1988–2000.
- 664 **Bianciotto V, Lumini E, Bonfante P, Vandamme P.** **2003.** ‘Candidatus  
665 *Glomeribacter gigasporarum*’ gen. nov., sp. nov., an endosymbiont of arbuscular  
666 mycorrhizal fungi. *International Journal of Systematic and Evolutionary*  
667 *Microbiology* **53**: 121–124.
- 668 **Bonfante P, Desirò A.** **2017.** Who lives in a fungus? The diversity, origins and  
669 functions of fungal endobacteria living in Mucoromycota. *The ISME Journal* **11**:  
670 1727–1735.
- 671 **Breullin F, Schramm J, Hajirezaei M, Ahkami A, Favre P, Druège U, Hause B,**  
672 **Bucher M, Kretschmar T, Bossolini E, et al.** **2010.** Phosphate systemically inhibits  
673 development of arbuscular mycorrhiza in *Petunia hybrida* and represses genes  
674 involved in mycorrhizal functioning. *The Plant Journal* **64**: 1002–1017.
- 675 **Bulgarelli D, Rott M, Schlaeppi K, Ver Loren van Themaat E, Ahmadinejad N,**  
676 **Assenza F, Rauf P, Huettel B, Reinhardt R, Schmelzer E, et al.** **2012.** Revealing  
677 structure and assembly cues for *Arabidopsis* root-inhabiting bacterial microbiota.  
678 *Nature* **488**: 91–95.
- 679 **Busby PE, Soman C, Wagner MR, Friesen ML, Kremer J, Bennett A, Morsy M,**  
680 **Eisen JA, Leach JE, Dangl JL.** **2017.** Research priorities for harnessing plant  
681 microbiomes in sustainable agriculture. *PLoS Biol* **15**: e2001793.
- 682 **Cordell D, Drangert J-O, White S.** **2009.** The story of phosphorus: Global food  
683 security and food for thought. *Global Environmental Change* **19**: 292–305.
- 684 **Cosme M, Fernández I, van der Heijden MGA, Pieterse CMJ.** **2018.** Non-  
685 Mycorrhizal Plants: The Exceptions that Prove the Rule. *Trends in Plant Science* **23**:  
686 577–587.
- 687 **Csardi G, Nepusz T.** **2006.** The igraph software package for complex network  
688 research. *InterJournal, Complex Systems* **1695**: 1–9.
- 689 **Desirò A, Hao Z, Liber JA, Benucci GMN, Lowry D, Roberson R, Bonito G.**  
690 **2018.** Mycoplasma -related endobacteria within Mortierellomycotina fungi: diversity,

- 691 distribution and functional insights into their lifestyle. *The ISME Journal* **12**: 1743–  
692 1757.
- 693 **Desirò A, Salvioli A, Ngonkeu EL, Mondo SJ, Epis S, Faccio A, Kaech A,**  
694 **Pawlowska TE, Bonfante P. 2014.** Detection of a novel intracellular microbiome  
695 hosted in arbuscular mycorrhizal fungi. *The ISME Journal* **8**: 257–270.
- 696 **Durán P, Thiergart T, Garrido-Oter R, Agler M, Kemen E, Schulze-Lefert P,**  
697 **Hacquard S. 2018.** Microbial interkingdom interactions in roots promote Arabidopsis  
698 survival.
- 699 **Flowers JJ, He S, Malfatti S, del Rio TG, Tringe SG, Hugenholtz P, McMahon**  
700 **KD. 2013.** Comparative genomics of two ‘Candidatus Accumulibacter’ clades  
701 performing biological phosphorus removal. *The ISME Journal* **7**: 2301–2314.
- 702 **Gyaneshwar P, Kumar GN, Parekh LJ, Poole PS. 2002.** Role of soil  
703 microorganisms in improving P nutrition of plants. *Plant and Soil* **245**: 83–93.
- 704 **Hacquard S, Garrido-Oter R, González A, Spaepen S, Ackermann G, Lebeis S,**  
705 **McHardy AC, Dangl JL, Knight R, Ley R, et al. 2015.** Microbiota and Host  
706 Nutrition across Plant and Animal Kingdoms. *Cell Host and Microbe* **17**: 603–616.
- 707 **Hamiaux C, Drummond RSM, Janssen BJ, Ledger SE, Cooney JM, Newcomb**  
708 **RD, Snowden KC. 2012.** DAD2 Is an alpha/beta Hydrolase Likely to Be Involved in  
709 the Perception of the Plant Branching Hormone, Strigolactone. **22**: 2032–2036.
- 710 **Hartman K, van der Heijden MGA, Wittwer RA, Banerjee S, Walser J-C,**  
711 **Schlaeppli K. 2018.** Cropping practices manipulate abundance patterns of root and  
712 soil microbiome members paving the way to smart farming. *Microbiome* **6**: 14.
- 713 **Hassani MA, Durán P, Hacquard S. 2018.** Microbial interactions within the plant  
714 holobiont. *Microbiome* **6**: 58.
- 715 **Hiruma K, Gerlach N, Sacristán S, Nakano RT, Hacquard S, Kracher B,**  
716 **Neumann U, Ramírez D, Bucher M, O’Connell RJ, et al. 2016.** Root Endophyte  
717 *Colletotrichum tofieldiae* Confers Plant Fitness Benefits that Are Phosphate Status  
718 Dependent. *Cell* **165**: 464–474.
- 719 **Huang J, Hu B, Qi K, Chen W, Pang X, Bao W, Tian G. 2016.** Effects of  
720 phosphorus addition on soil microbial biomass and community composition in a  
721 subalpine spruce plantation. *European Journal of Soil Biology* **72**: 35–41.
- 722 **Ihrmark K, Bödeker ITM, Cruz-Martinez K, Friberg H, Kubartova A, Schenck**  
723 **J, Strid Y, Stenlid J, Brandström-Durling M, Clemmensen KE, et al. 2012a.** New  
724 primers to amplify the fungal ITS2 region--evaluation by 454-sequencing of artificial  
725 and natural communities. *FEMS microbiology ecology* **82**: 666–677.
- 726 **Ihrmark K, Bödeker ITM, Cruz-Martinez K, Friberg H, Kubartova A, Schenck**  
727 **J, Strid Y, Stenlid J, Brandström-Durling M, Clemmensen KE, et al. 2012b.** New  
728 primers to amplify the fungal ITS2 region--evaluation by 454-sequencing of artificial  
729 and natural communities. *FEMS microbiology ecology* **82**: 666–677.

- 730 **Ikoyi I, Fowler A, Schmalenberger A. 2018.** One-time phosphate fertilizer  
731 application to grassland columns modifies the soil microbiota and limits its role in  
732 ecosystem services. *Science of The Total Environment* **630**: 849–858.
- 733 **Jacoby R, Peukert M, Succurro A, Koprivova A, Kopriva S. 2017.** The Role of  
734 Soil Microorganisms in Plant Mineral Nutrition—Current Knowledge and Future  
735 Directions. *Frontiers in plant science* **8**: 636.
- 736 **Jakobsen I, Abbott LK, Robson AD. 1992.** External hyphae of vesicular—  
737 arbuscular mycorrhizal fungi associated with *Trifolium subterraneum* L. *New*  
738 *Phytologist* **120**: 509–516.
- 739 **Jost L. 2007.** Partitioning diversity into independent alpha and beta components.  
740 *Ecology* **88**: 2427–2439.
- 741 **Lay C-Y, Hamel C, St-Arnaud M. 2018.** Taxonomy and pathogenicity of *Olpidium*  
742 brassicae and its allied species. *Fungal Biology*.
- 743 **Leff JW, Jones SE, Prober SM, Barberán A, Borer ET, Firn JL, Harpole WS,**  
744 **Hobbie SE, Hofmockel KS, Knops JMH, et al. 2015.** Consistent responses of soil  
745 microbial communities to elevated nutrient inputs in grasslands across the globe.  
746 *Proceedings of the National Academy of Sciences of the United States of America*  
747 **112**: 10967–10972.
- 748 **Lekberg Y, Gibbons SM, Rosendahl S. 2014.** Will different OTU delineation  
749 methods change interpretation of arbuscular mycorrhizal fungal community patterns?  
750 *New Phytologist* **202**: 1101–1104.
- 751 **Liu G, Pfeifer J, de Brito Francisco R, Emonet A, Stirnemann M, Gubeli C,**  
752 **Hutter O, Sasse J, Mattheyer C, Stelzer E, et al. 2018.** Changes in the allocation of  
753 endogenous strigolactone improve plant biomass production on phosphate-poor soils.  
754 *New Phytologist* **217**: 784–798.
- 755 **McGonigle TP, Miller MH, Evans DG, Fairchild GL, Swan JA. 1990.** A new  
756 method which gives an objective measure of colonization of roots by vesicular—  
757 arbuscular mycorrhizal fungi. *New Phytologist* **115**: 495–501.
- 758 **McGuire KL, Payne SG, Palmer MI, Gillikin CM, Keefe D, Kim SJ, Gedalovich**  
759 **SM, Discenza J, Rangamannar R, Koshner JA, et al. 2013a.** Digging the New  
760 York City Skyline: Soil Fungal Communities in Green Roofs and City Parks. *PLoS*  
761 *ONE* **8**: 1–13.
- 762 **McGuire KL, Payne SG, Palmer MI, Gillikin CM, Keefe D, Kim SJ, Gedalovich**  
763 **SM, Discenza J, Rangamannar R, Koshner JA, et al. 2013b.** Digging the New  
764 York City Skyline: Soil Fungal Communities in Green Roofs and City Parks. *PLoS*  
765 *ONE* **8**: 1–13.
- 766 **McMurdie PJ, Holmes S. 2013.** phyloseq: an R package for reproducible interactive  
767 analysis and graphics of microbiome census data. (M Watson, Ed.). *PLoS ONE* **8**:  
768 e61217.

- 769 **Oksanen J, Blanchet FG, Friendly M, Kindt R, Legendre P, McGlenn D,**  
770 **Minchin PR, O'Hara RB, Simpson GL, Solymos P, et al. 2018.** vegan: Community  
771 Ecology Package.
- 772 **Öpik M, Metsis M, Daniell TJ, Zobel M, Moora M. 2009.** Large-scale parallel 454  
773 sequencing reveals host ecological group specificity of arbuscular mycorrhizal fungi  
774 in a boreonemoral forest. *New Phytologist* **184**: 424–437.
- 775 **R Core Team. 2016.** *R: A Language and Environment for Statistical Computing.*  
776 Vienna, Austria.
- 777 **Rao NN, Kornberg A. 1996.** Inorganic polyphosphate supports resistance and  
778 survival of stationary-phase *Escherichia coli*. *Journal of Bacteriology* **178**: 1394–  
779 1400.
- 780 **Reddy DMRS, Schorderet M, Feller U, Reinhardt D. 2007.** A petunia mutant  
781 affected in intracellular accommodation and morphogenesis of arbuscular mycorrhizal  
782 fungi. *The Plant Journal* **51**: 739–750.
- 783 **Reijnders L. 2014.** Phosphorus resources, their depletion and conservation, a review.  
784 *Resources, Conservation and Recycling* **93**: 32–49.
- 785 **Robbins C, Thiergart T, Hacquard S, Garrido-Oter R, Gans W, Peiter E,**  
786 **Schulze-Lefert P, Spaepen S. 2018.** Root-Associated Bacterial and Fungal  
787 Community Profiles of *Arabidopsis thaliana* Are Robust Across Contrasting Soil P  
788 Levels. *Phytobiomes* **2**: 24–34.
- 789 **Robinson MD, Oshlack A. 2010.** A scaling normalization method for differential  
790 expression analysis of RNA-seq data. **11**: R25.
- 791 **Robinson MD, McCarthy DJ, Smyth GK. 2010.** edgeR: a Bioconductor package  
792 for differential expression analysis of digital gene expression data. *Bioinformatics* **26**:  
793 139–140.
- 794 **Rodríguez H, Fraga R. 1999.** Phosphate solubilizing bacteria and their role in plant  
795 growth promotion. *Biotechnology Advances* **17**: 319–339.
- 796 **RStudio Team. 2015.** *RStudio: Integrated Development Environment for R.* Boston,  
797 MA.
- 798 **Salvioli A, Ghignone S, Novero M, Navazio L, Venice F, Bagnaresi P, Bonfante**  
799 **P. 2016.** Symbiosis with an endobacterium increases the fitness of a mycorrhizal  
800 fungus, raising its bioenergetic potential. *The ISME Journal* **10**: 130–144.
- 801 **Schlaeppli K, Bulgarelli D. 2015.** The plant microbiome at work. *Molecular Plant-*  
802 *Microbe Interactions* **28**: 212–217.
- 803 **Schlaeppli K, Bender SF, Mascher F, Russo G, Patrignani A, Camenzind T,**  
804 **Hempel S, Rillig MC, Heijden MGA. 2016.** High-resolution community profiling of  
805 arbuscular mycorrhizal fungi. *New Phytologist* **212**: 780–791.

- 806 **Scholz RW, Wellmer F-W. 2013.** Approaching a dynamic view on the availability of  
807 mineral resources: What we may learn from the case of phosphorus? *Global*  
808 *Environmental Change* **23**: 11–27.
- 809 **Sharma SB, Sayyed RZ, Trivedi MH, Gobi TA. 2013.** Phosphate solubilizing  
810 microbes: sustainable approach for managing phosphorus deficiency in agricultural  
811 soils. *SpringerPlus* **2**: 587.
- 812 **Sheldon AL. 1969.** Equitability Indices: Dependence on the Species Count. *Ecology*  
813 **50**: 466–467.
- 814 **Silva UC, Medeiros JD, Leite LR, Morais DK, Cuadros-Orellana S, Oliveira CA,**  
815 **de Paula Lana UG, Gomes EA, Santos Dos VL. 2017.** Long-Term Rock Phosphate  
816 Fertilization Impacts the Microbial Communities of Maize Rhizosphere. *Frontiers in*  
817 *microbiology* **8**: 2276.
- 818 **Spatafora JW, Chang Y, Benny GL, Lazarus K, Smith ME, Berbee ML, Bonito**  
819 **G, Corradi N, Grigoriev I, Gryganskyi A, et al. 2017.** A phylum-level phylogenetic  
820 classification of zygomycete fungi based on genome-scale data. *Mycologia* **108**:  
821 1028–1046.
- 822 **Stockinger H, Krüger M, Schübler A. 2010.** DNA barcoding of arbuscular  
823 mycorrhizal fungi. *New Phytologist* **187**: 461–474.
- 824 **Taktek S, Trépanier M, Servin PM, St-Arnaud M, Piché Y, Fortin JA, Antoun**  
825 **H. 2015.** Trapping of phosphate solubilizing bacteria on hyphae of the arbuscular  
826 mycorrhizal fungus *Rhizophagus irregularis* DAOM 197198. *Soil Biology and*  
827 *Biochemistry* **90**: 1–9.
- 828 **Tkacz A, Cheema J, Chandra G, Grant A, Poole PS. 2015.** Stability and  
829 succession of the rhizosphere microbiota depends upon plant type and soil  
830 composition. *The ISME Journal*: 1–11.
- 831 **Uehling J, Gryganskyi A, Hameed K, Tschaplinski T, Misztal PK, Wu S, Desiro**  
832 **A, Pol NV, Du Z, Zienkiewicz A, et al. 2017.** Comparative genomics of *Mortierella*  
833 *elongata* and its bacterial endosymbiont *Mycoavidus cysteinexigens*. *Environmental*  
834 *Microbiology* **19**: 2964–2983.
- 835 **van der Heijden MGA, Hartmann M. 2016.** Networking in the Plant Microbiome.  
836 *PLoS Biol* **14**: e1002378.
- 837 **van der Heijden MGA, Dombrowski N, Schlaeppi K. 2017.** Continuum of root–  
838 fungal symbioses for plant nutrition. *Proceedings of the National Academy of*  
839 *Sciences* **114**: 201716329–11576.
- 840 **Vandenbussche M, Chambrier P, Rodrigues Bento S, Morel P. 2016.** Petunia,  
841 Your Next Supermodel? *Frontiers in plant science* **7**: 577.
- 842 **Vandenkoornhuysen P, Quaiser A, Duhamel M, Le Van A, Dufresne A. 2015.** The  
843 importance of the microbiome of the plant holobiont. *New Phytologist* **206**: 1196–  
844 1206.

- 845 **VDLUFA-Verlag (Ed.). 2006.** Bestimmung von ausgewählten Elementen in  
846 pflanzlichem Material und Futtermitteln mit ICP-OES. VDLUFA: Die chemische  
847 Untersuchung von Futtermitteln. Darmstadt.
- 848 **Vierheilig H, Coughlan A, Wyss U, Piche Y. 1998.** Ink and vinegar, a simple  
849 staining technique for arbuscular-mycorrhizal fungi. *Applied and Environmental*  
850 *Microbiology* **64**: 5004–5007.
- 851 **Wakelin S, Mander C, Gerard E, Jansa J, Erb A, Young S, Condron L,**  
852 **O’Callaghan M. 2012.** Response of soil microbial communities to contrasted  
853 histories of phosphorus fertilisation in pastures. *Applied Soil Ecology* **61**: 40–48.
- 854 **Wegmüller S, Svistoonoff S, Reinhardt D, Stuurman J, Amrhein N, Bucher M.**  
855 **2008.** A transgenic dTph1 insertional mutagenesis system for forward genetics in  
856 mycorrhizal phosphate transport of *Petunia*. *The Plant Journal* **54**: 1115–1127.
- 857 **Yadav V, Kumar M, Deep DK, Kumar H, Sharma R, Tripathi T, Tuteja N,**  
858 **Saxena AK, Johri AK. 2010.** A phosphate transporter from the root endophytic  
859 fungus *Piriformospora indica* plays a role in the phosphate transport to the host plant.  
860 *Journal of Biological Chemistry* **285**: jbc.M110.111021–26544.
- 861

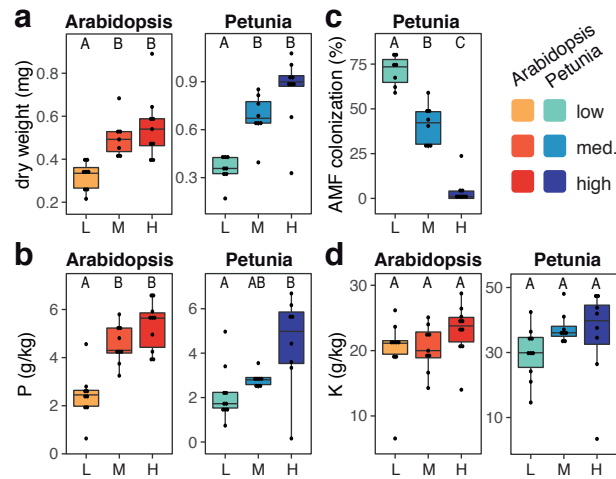

1  
2

3 **Figure 1 | Effectiveness of manipulated phosphate levels on plant growth, leaf nutrient**  
4 **levels and levels of AMF root colonization**

5 Arabidopsis (reddish colors, see legend) and Petunia (blueish colors) were grown at low (L),  
6 medium (M) and high (H, increasing hue) levels of P availability and basic plant parameters  
7 were recorded to confirm that the experimental setup. Parameters included (a) above-ground  
8 plant biomass, (b) leaf phosphorus levels, (c) Petunia root colonization by arbuscular  
9 mycorrhizal fungi (AMF) and (d) leaf potassium levels. A linear model was used to test for  
10 effects of P availability for panels (a) (log-transformed data), (b) and (d) and a quasibinomial  
11 generalized linear model for panel (c). Different letters indicate significant pairwise  
12 differences among sample groups ( $P < 0.05$ , Tukey HSD).

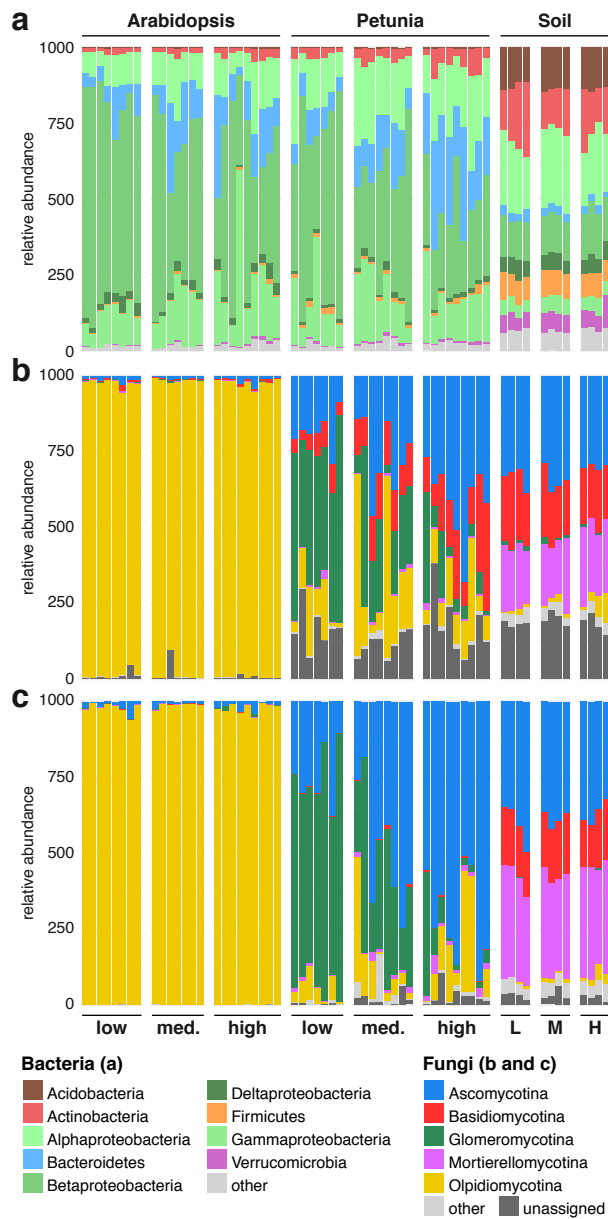

13

14

15

**Figure 2 | Taxonomic profiles of microbial communities at phylum level**

16

(a) Bacteria profiles were obtained using MiSeq sequencing while fungal profiles were

17

determined using (b) MiSeq and (c) SMRT sequencing. Phyla with relative abundances lower

18

than 1% were summarized with 'other'. Levels of P-availability are indicated with low (L),

19

medium (med.; M) or high (H).



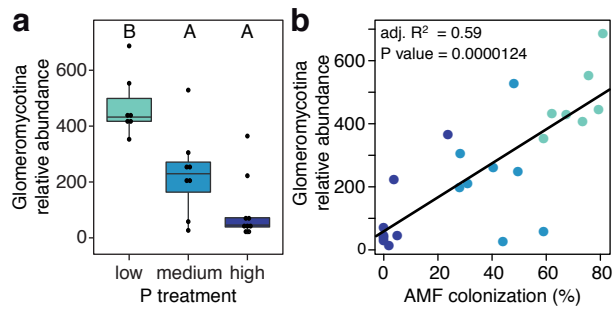

20

21

### 22 **Figure 3 | Abundance of AMF in Petunia roots**

23 (a) Quantification of AMF based on the relative abundance of Glomeromycotina sequences in  
24 the microbiota profiles. Relative abundances were calculated from total sum normalized data.

25 A quasibinomial generalized linear model was used to test for effects due to P availability.

26 Different letters indicate significant pairwise differences between sample groups ( $P < 0.05$ ,

27 Tukey HSD). This data was correlated (b) with the levels of AMF root colonization as measured

28 in the same samples by microscopy (data presented in Fig. 1c).

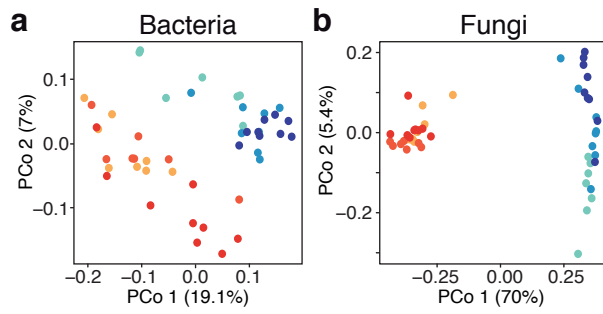

29

30

31 **Figure 4 | Effects of plant species and P-levels on community composition**

32 Unconstrained ordinations with PCoA using Bray-Curtis dissimilarities were performed on the  
33 (a) bacterial and (b) fungal communities associated with roots. Samples were colored  
34 following the color scheme defined in Fig. 1 (Arabidopsis and Petunia with reddish and blueish  
35 colors, respectively, and the increasing P availability (low, medium to high) are marked with  
36 increasing hue.

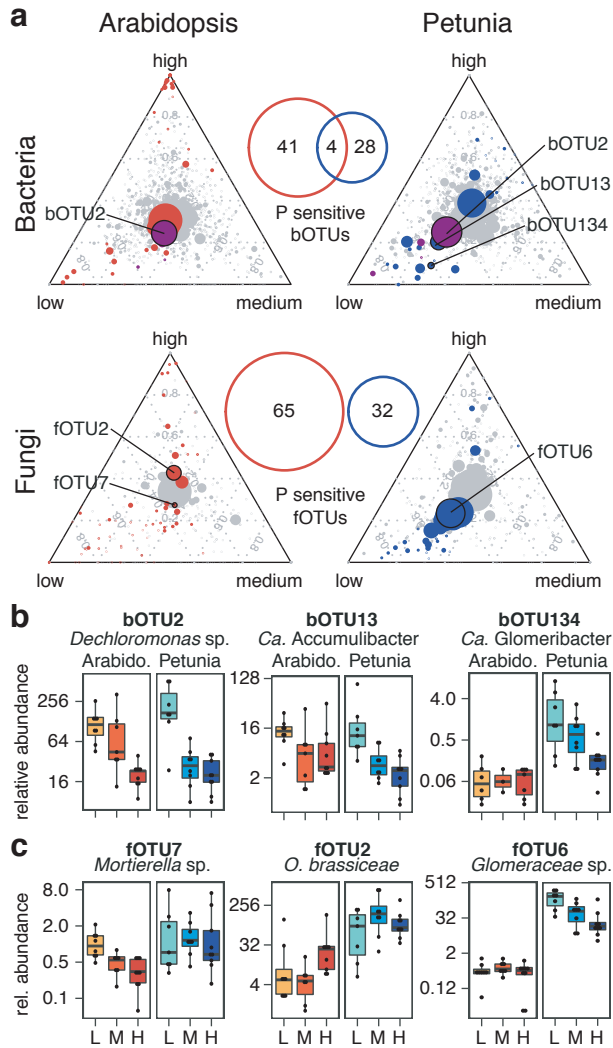

37  
38

39 **Figure 5 | Identifying phosphate sensitive microbes**

40 P sensitive OTUs (differentially abundant between low and high P conditions) were separately  
 41 identified for the bacteria and fungi, both in Arabidopsis and Petunia (edgeR analysis, high vs  
 42 low P, FDR < 0.05). (a) The ternary plots depict individual OTUs (in circles), sized by their  
 43 relative abundance, and the position of the OTUs in the triangle reflects their proportional  
 44 abundance in low, medium and high P samples. P sensitive OTUs are colored in red  
 45 (Arabidopsis), blue (Petunia) or purple (found in both species) and non-affected OTUs are  
 46 colored in gray. The number of P sensitive OTUs and their overlap between species is given  
 47 with the venn diagrams. Panels b and c illustrate the relative abundances (per milles) of a few  
 48 representative P sensitive bacterial and fungal OTUs in low (L), medium (M) and high (H) P  
 49 conditions (They are also indicated in the ternary plots).

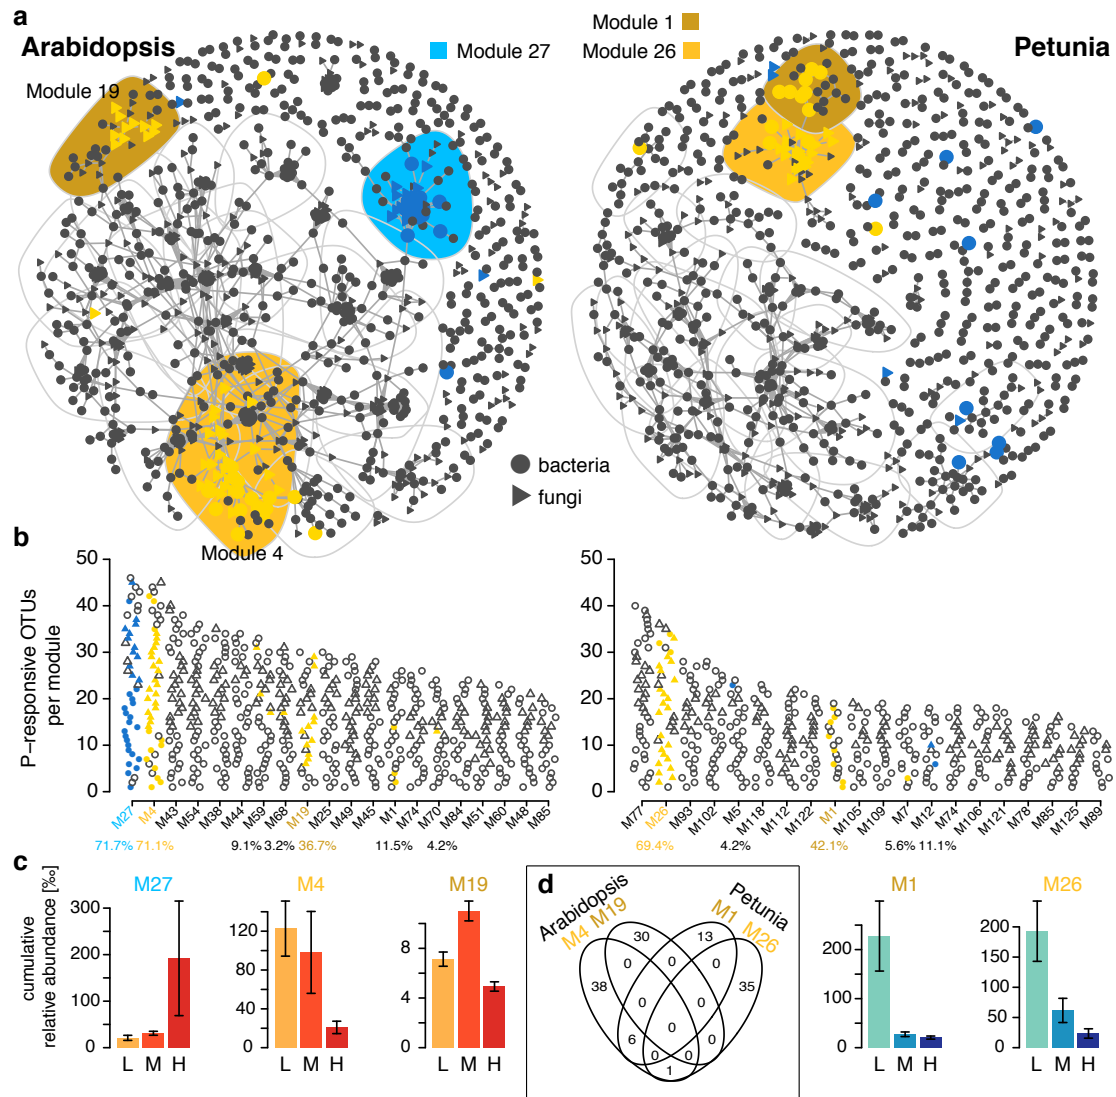

50

51

52 **Figure 6 | Microbial co-occurrence patterns along the gradient of plant-available phosphate**  
 53 (a) Co-occurrence networks visualize the significant positive pairwise correlations ( $\rho > 0.7$ ,  $P <$   
 54  $0.001$ ; indicated by links between OTUs) between bacteria (circles) and fungi (triangles) OTUs  
 55 in Arabidopsis and Petunia root communities. P sensitive OTUs, which are abundant under  
 56 low and high P conditions, are colored in yellow and blue, respectively. The twenty network  
 57 modules comprising highest numbers of OTUs are rimmed with grey lines with the modules  
 58 containing high proportions of P-responsive OTUs being shaded in yellow and blue. (b) Top  
 59 twenty most populated modules, ranked by decreasing numbers of OTUs (bOTUs in circles;  
 60 fOTUs as triangles) with low and high P sensitive OTUs being colored in yellow and blue,  
 61 respectively. Percentages below the x-axis report the proportion of P sensitive OTUs present  
 62 in each module. (c) Cumulative relative abundance (as permilles) of all bacteria and fungi OTUs  
 63 in the P sensitive modules in low (L), medium (M) and high (H) P conditions. The cumulative  
 64 relative abundance indicates the overall response of the microbes in the P sensitive modules.  
 65 (d) Number and overlap of OTUs in the low P sensitive modules of Arabidopsis and Petunia  
 66 are shown with the venn diagram.

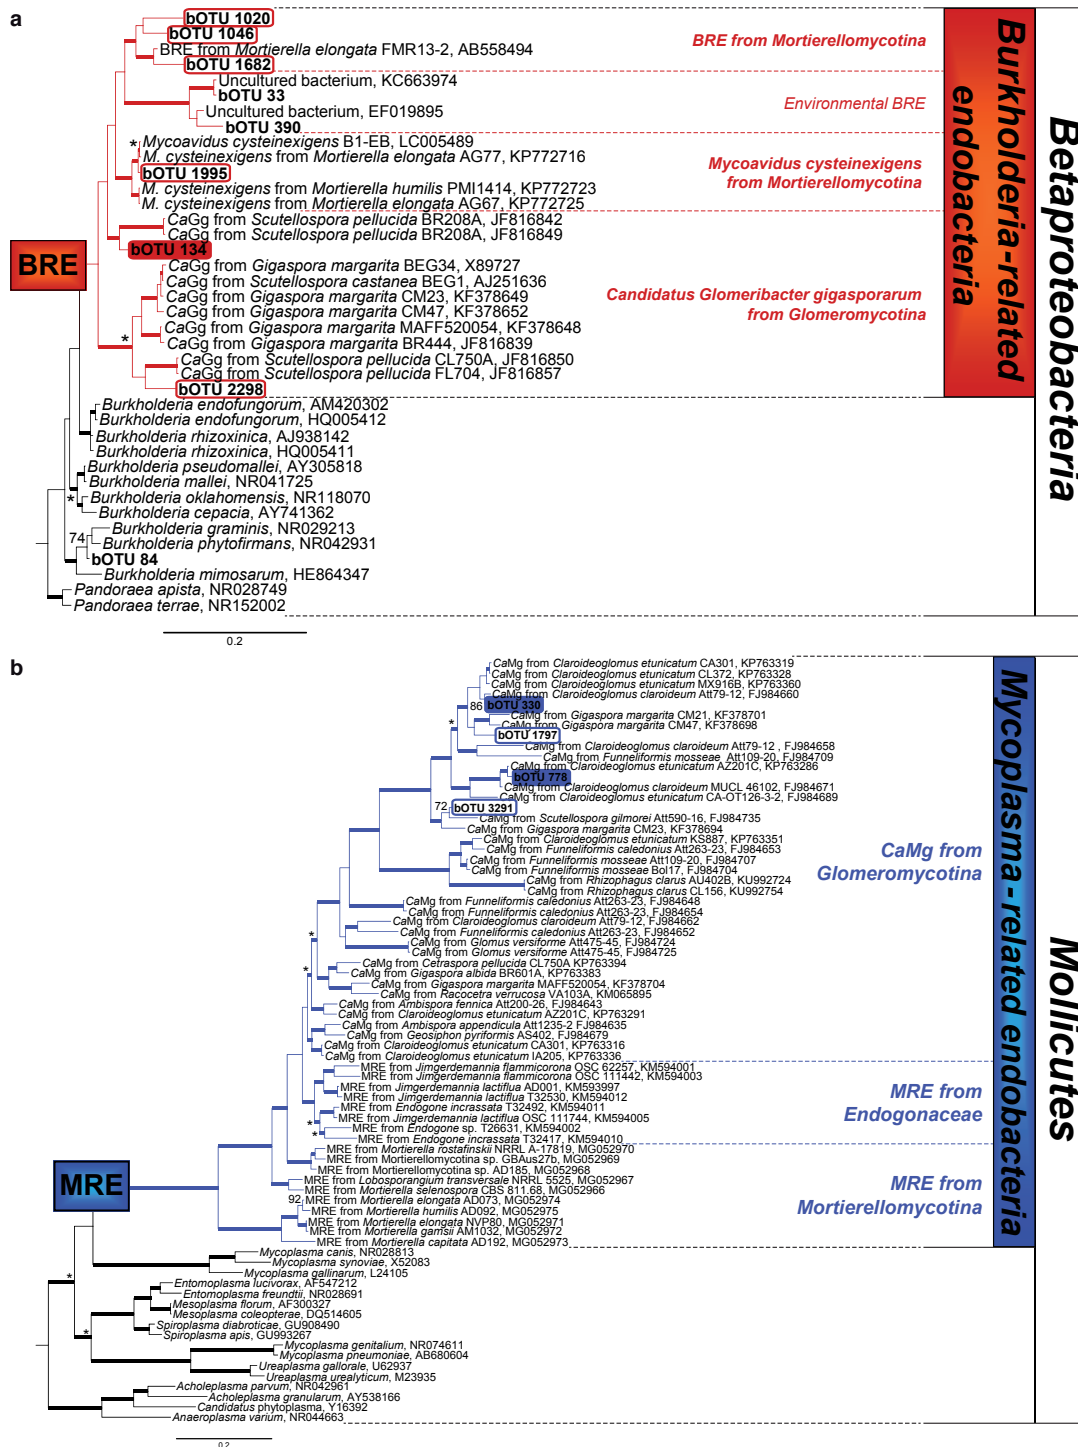

67  
68

**Figure 7 | Phylogenetic placement of endobacteria OTUs from candidates identified by the clustering approach**

Simplified trees summarizing the confirmed Burkholderia-related endobacteria (BRE, a) and Mollicutes-related endobacteria (MRE, b); the detailed tree is available as Fig. S6. (a) Four candidate BRE OTUs cluster within two clades encompassing BRE sequences from Mortierellomycotina fungi. In detail, bOTU 1995 is sister to the type strain of *Mycoavidus cysteinexigens*, whereas bOTUs 1020, 1046 and 1682 cluster with an undescribed BRE hosted in *Mortierella elongata*. Two bOTUs (134 and 2298) cluster within two clades encompassing *Candidatus Glomeribacter gigasporarum* (*CaGg*) sequences retrieved from *Scutellospora pellucida* (*Glomeromycotina*). Two bOTUs (33 and 390) cluster within a new BRE clade,

79 together with putative environmental BRE sequences. **(b)** Four candidate MRE OTUs cluster  
80 within different clades encompassing *Candidatus Moeniiplasma glomeromycotinum* (CaMg)  
81 sequences from Glomeromycotina fungi. In detail, bOTUs 330 and 778 cluster with CaMg  
82 hosted in several strains of *Claroideoglossum* spp., whereas bOTUs 1797 and 3291 cluster with  
83 CaMg hosted in several strains of *Gigaspora margarita* and *Scutellospora pellucida*. The trees  
84 show the topology obtained with the Bayesian method. Branches with Bayesian posterior  
85 probabilities (BPP)  $\geq 0.95$  and ML bootstrap support values  $\geq 70$  are thickened; asterisks (\*)  
86 indicate branches with BPP  $\geq 0.95$  but ML bootstrap support values  $< 70$ ; ML bootstrap support  
87 values  $\geq 70$  are shown for branches having BPP  $< 0.95$ . Sequences generated in this study are  
88 in bold.
